# Supplementary material
Source: PubMed Central journal article supplement (PMC2783833)
Supplement: NIHMS130975-supplement-01.pdf [file NIHMS130975-supplement-01.pdf]

Supplemental Table 1: Sequence identity chart for all sequences used in the GR alignment.

|                            | <i>H.sapiens</i> | <i>M.musculus</i> | <i>D.rerio</i> | <i>C.carpio GR1b</i> | <i>C.carpio GR2</i> | <i>A.burtoni GR1</i> | <i>G.aculeatus GR1</i> | <i>T.rubripes GR2</i> | <i>O.latipes GR2</i> | <i>T.nigroviridis GR1</i> | <i>O.mykiss GR1</i> | <i>O.mykiss GR2</i> | <i>S.trutta</i> | <i>P.olivaceus</i> | <i>D.labrax</i> | <i>C.carpio GR1a</i> | <i>A.burtoni GR2b</i> | <i>G.aculeatus GR2</i> | <i>T.rubripes GR1</i> | <i>O.latipes GR1</i> | <i>T.nigroviridis GR2</i> | <i>P.notatus</i> |
|----------------------------|------------------|-------------------|----------------|----------------------|---------------------|----------------------|------------------------|-----------------------|----------------------|---------------------------|---------------------|---------------------|-----------------|--------------------|-----------------|----------------------|-----------------------|------------------------|-----------------------|----------------------|---------------------------|------------------|
| <i>H.sapiens</i>           | 100              | 95                | 73             | 74                   | 72                  | 73                   | 71                     | 65                    | 71                   | 75                        | 75                  | 72                  | 72              | 74                 | 73              | 74                   | 73                    | 72                     | 71                    | 70                   | 71                        | 68               |
| <i>M.musculus</i>          | 95               | 100               | 74             | 74                   | 73                  | 74                   | 72                     | 65                    | 72                   | 75                        | 74                  | 73                  | 74              | 73                 | 73              | 74                   | 74                    | 72                     | 71                    | 70                   | 72                        | 68               |
| <i>D.rerio</i>             | 73               | 74                | 100            | 86                   | 93                  | 87                   | 87                     | 78                    | 88                   | 86                        | 87                  | 85                  | 84              | 81                 | 81              | 86                   | 80                    | 82                     | 79                    | 77                   | 78                        | 78               |
| <i>C.carpio GR1b</i>       | 74               | 74                | 86             | 100                  | 86                  | 86                   | 87                     | 80                    | 87                   | 88                        | 88                  | 90                  | 88              | 86                 | 85              | 100                  | 84                    | 85                     | 82                    | 82                   | 81                        | 82               |
| <i>C.carpio GR2</i>        | 72               | 73                | 93             | 86                   | 100                 | 87                   | 86                     | 77                    | 86                   | 85                        | 86                  | 84                  | 83              | 81                 | 80              | 85                   | 81                    | 81                     | 79                    | 77                   | 79                        | 77               |
| <i>A.burtoni GR1</i>       | 73               | 74                | 87             | 86                   | 87                  | 100                  | 92                     | 84                    | 92                   | 92                        | 91                  | 85                  | 85              | 84                 | 82              | 86                   | 82                    | 84                     | 80                    | 79                   | 80                        | 79               |
| <i>G.aculeatus GR1</i>     | 71               | 72                | 87             | 87                   | 86                  | 92                   | 100                    | 84                    | 92                   | 91                        | 92                  | 87                  | 86              | 83                 | 82              | 87                   | 81                    | 84                     | 81                    | 79                   | 80                        | 78               |
| <i>T.rubripes GR2</i>      | 65               | 65                | 78             | 80                   | 77                  | 84                   | 84                     | 100                   | 83                   | 85                        | 81                  | 77                  | 76              | 75                 | 75              | 78                   | 73                    | 77                     | 73                    | 71                   | 72                        | 80               |
| <i>O.latipes GR2</i>       | 71               | 72                | 88             | 87                   | 86                  | 92                   | 92                     | 83                    | 100                  | 91                        | 90                  | 86                  | 85              | 83                 | 83              | 86                   | 80                    | 83                     | 80                    | 77                   | 78                        | 77               |
| <i>T.nigroviridis GR1</i>  | 75               | 75                | 86             | 88                   | 85                  | 92                   | 91                     | 85                    | 91                   | 100                       | 90                  | 86                  | 85              | 82                 | 81              | 88                   | 80                    | 82                     | 78                    | 78                   | 79                        | 79               |
| <i>O.mykiss GR1</i>        | 75               | 74                | 87             | 88                   | 86                  | 91                   | 92                     | 81                    | 90                   | 90                        | 100                 | 88                  | 87              | 84                 | 82              | 87                   | 83                    | 85                     | 81                    | 79                   | 81                        | 80               |
| <i>O.mykiss GR2*</i>       | 72               | 73                | 85             | 90                   | 84                  | 85                   | 87                     | 77                    | 86                   | 86                        | 88                  | 100                 | 97              | 88                 | 88              | 90                   | 87                    | 90                     | 86                    | 85                   | 83                        | 83               |
| <i>S.trutta*</i>           | 72               | 74                | 84             | 88                   | 83                  | 85                   | 86                     | 76                    | 85                   | 85                        | 87                  | 97                  | 100             | 89                 | 88              | 88                   | 87                    | 90                     | 86                    | 85                   | 83                        | 84               |
| <i>P.olivaceus*</i>        | 74               | 73                | 81             | 86                   | 81                  | 84                   | 83                     | 75                    | 83                   | 82                        | 84                  | 88                  | 89              | 100                | 98              | 87                   | 95                    | 96                     | 92                    | 92                   | 90                        | 88               |
| <i>D.labrax*</i>           | 73               | 73                | 81             | 85                   | 80                  | 82                   | 82                     | 75                    | 83                   | 81                        | 82                  | 88                  | 88              | 98                 | 100             | 85                   | 94                    | 96                     | 92                    | 92                   | 90                        | 88               |
| <i>C.carpio GR1a*</i>      | 74               | 74                | 86             | 100                  | 85                  | 86                   | 87                     | 78                    | 86                   | 88                        | 87                  | 90                  | 88              | 87                 | 85              | 100                  | 84                    | 87                     | 84                    | 82                   | 81                        | 82               |
| <i>A.burtoni GR2b*</i>     | 73               | 74                | 80             | 84                   | 81                  | 82                   | 81                     | 73                    | 80                   | 80                        | 83                  | 87                  | 87              | 95                 | 94              | 84                   | 100                   | 95                     | 91                    | 89                   | 90                        | 86               |
| <i>G.aculeatus GR2*</i>    | 72               | 72                | 82             | 85                   | 81                  | 84                   | 84                     | 77                    | 83                   | 82                        | 85                  | 90                  | 90              | 96                 | 96              | 87                   | 95                    | 100                    | 91                    | 92                   | 90                        | 85               |
| <i>T.rubripes GR1*</i>     | 71               | 71                | 79             | 82                   | 79                  | 80                   | 81                     | 73                    | 80                   | 78                        | 81                  | 86                  | 86              | 92                 | 92              | 84                   | 91                    | 91                     | 100                   | 88                   | 89                        | 84               |
| <i>O.latipes GR1*</i>      | 70               | 70                | 77             | 82                   | 77                  | 79                   | 79                     | 71                    | 77                   | 78                        | 79                  | 85                  | 85              | 92                 | 92              | 82                   | 89                    | 92                     | 88                    | 100                  | 88                        | 85               |
| <i>T.nigroviridis GR2*</i> | 71               | 72                | 78             | 81                   | 79                  | 80                   | 80                     | 72                    | 78                   | 79                        | 81                  | 83                  | 83              | 90                 | 90              | 81                   | 90                    | 90                     | 89                    | 88                   | 100                       | 83               |
| <i>P.notatus</i>           | 68               | 68                | 78             | 82                   | 77                  | 79                   | 78                     | 80                    | 77                   | 79                        | 80                  | 83                  | 84              | 88                 | 88              | 82                   | 86                    | 85                     | 84                    | 85                   | 83                        | 100              |

\*GRs marked with an asterisk have a DBD insert.
