# Supplementary material
Source: PubMed Central journal article supplement (PMC2783833)
Supplement: NIHMS130975-supplement-02.pdf [file NIHMS130975-supplement-02.pdf]

Supplemental Table 2: Sequence identity chart for all sequences used in the MR alignment.

|                       | <i>H.sapiens</i> | <i>M.musculus</i> | <i>D.rerio</i> | <i>G.aculeatus</i> | <i>T.rubripes</i> | <i>O.latipes</i> | <i>T.nigroviridis</i> | <i>O.mykiss</i> | <i>C.carpio</i> | <i>A.burtoni</i> | <i>P.notatus</i> |
|-----------------------|------------------|-------------------|----------------|--------------------|-------------------|------------------|-----------------------|-----------------|-----------------|------------------|------------------|
| <i>H.sapiens</i>      | <b>100</b>       | 95                | 74             | 69                 | 67                | 70               | 68                    | 69              | 73              | 68               | 74               |
| <i>M.musculus</i>     | 95               | <b>100</b>        | 74             | 68                 | 68                | 70               | 69                    | 71              | 73              | 71               | 75               |
| <i>D.rerio</i>        | 74               | 74                | <b>100</b>     | 84                 | 83                | 85               | 84                    | 88              | 95              | 85               | 88               |
| <i>G.aculeatus</i>    | 69               | 68                | 84             | <b>100</b>         | 91                | 92               | 92                    | 87              | 84              | 94               | 93               |
| <i>T.rubripes</i>     | 67               | 68                | 83             | 91                 | <b>100</b>        | 91               | 95                    | 87              | 82              | 92               | 93               |
| <i>O.latipes</i>      | 70               | 70                | 85             | 92                 | 91                | <b>100</b>       | 92                    | 89              | 87              | 96               | 90               |
| <i>T.nigroviridis</i> | 68               | 69                | 84             | 92                 | 95                | 92               | <b>100</b>            | 85              | 84              | 93               | 92               |
| <i>O.mykiss</i>       | 69               | 71                | 88             | 87                 | 87                | 89               | 85                    | <b>100</b>      | 86              | 88               | 87               |
| <i>C.carpio</i>       | 73               | 73                | 95             | 84                 | 82                | 87               | 84                    | 86              | <b>100</b>      | 83               | 86               |
| <i>A.burtoni</i>      | 68               | 71                | 85             | 94                 | 92                | 96               | 93                    | 88              | 83              | <b>100</b>       | 95               |
| <i>P.notatus</i>      | 74               | 75                | 88             | 93                 | 93                | 90               | 92                    | 87              | 86              | 95               | <b>100</b>       |
