# Supplementary material
Source: PubMed Central journal article supplement (PMC2783833)
Supplement: NIHMS130975-supplement-03.pdf [file NIHMS130975-supplement-03.pdf]

Supplemental Table 3: Comparisons of GR mRNA levels for each tissue between midshipman reproductive morphs

| <b>Morph</b>                                                                             | <b>Breeding Season Tissue</b> | <b>Norm. mean</b>    | <b>Standard error</b> | <b>ANOVA values</b> |
|------------------------------------------------------------------------------------------|-------------------------------|----------------------|-----------------------|---------------------|
| Male Type I                                                                              | <b>OB/Tel/POA</b>             | 0.0152* <sup>1</sup> | 0.0015                | p=0.0001            |
| Male Type II                                                                             |                               | 0.0353* <sup>1</sup> | 0.0102                | dF=2, 11            |
| Female                                                                                   |                               | 0.0071               | 0.0002                | Fratio=22.60        |
| Male Type I                                                                              | <b>Mid/Di/Cbl</b>             | 0.0131               | 0.0024                | p=0.0020            |
| Male Type II                                                                             |                               | 0.0266* <sup>2</sup> | 0.0063                | dF=2, 11            |
| Female                                                                                   |                               | 0.0065               | 0.0007                | Fratio=11.55        |
| Male Type I                                                                              | <b>Vocal Hindbrain – SC</b>   | 0.007                | 0.0006                | p<0.0001            |
| Male Type II                                                                             |                               | 0.042* <sup>3</sup>  | 0.0091                | dF=2, 11            |
| Female                                                                                   |                               | 0.0051               | 0.0005                | Fratio=67.79        |
| Male Type I                                                                              | <b>Vocal Muscle</b>           | 0.0275* <sup>4</sup> | 0.0062                | p=0.0137            |
| Male Type II                                                                             |                               | 0.0113               | 0.002                 | dF=2, 11            |
| Female                                                                                   |                               | 0.0133               | 0.0013                | Fratio=6.49         |
| Male Type I                                                                              | <b>Liver</b>                  | 0.0398* <sup>4</sup> | 0.0081                | p=0.0011            |
| Male Type II                                                                             |                               | 0.0163               | 0.0026                | dF=2, 10            |
| Female                                                                                   |                               | 0.0129               | 0.0013                | Fratio=14.62        |
| Male Type I                                                                              | <b>Testis</b>                 | 0.0191               | 0.0056                | p=0.6453            |
| Male Type II                                                                             |                               | 0.0215               | 0.006                 | dF=1, 8             |
| <sup>1</sup> II>I>F, <sup>2</sup> II>F, <sup>3</sup> II>I and F, <sup>4</sup> I>II and F |                               |                      |                       | Fratio=0.2287       |

Supplemental Table 3: Glucocorticoid receptor (GR) mRNA levels for tissues sampled in the three midshipman reproductive morphs. Mean normalized values (see Fig. 3 legend) and standard errors for mRNA levels are listed according to midshipman reproductive morph (column 1) for each tissue sampled (column 2, see Fig. 3 for abbreviations). ANOVA values (p value, degrees of freedom-dF, and Fratio) are also listed for each analysis performed for each tissue. Asterisks indicate significantly greater values over one or both other morphs for each tissue (see footnotes).
