# Supplementary material
Source: PubMed Central journal article supplement (PMC2783833)
Supplement: NIHMS130975-supplement-04.pdf [file NIHMS130975-supplement-04.pdf]

Supplemental Table 4: Comparisons of MR mRNA levels for each tissue between midshipman reproductive morphs

| Morph        | Breeding Season Tissue      | Norm. mean           | Standard error | ANOVA values  |
|--------------|-----------------------------|----------------------|----------------|---------------|
| Male Type I  | <b>OB/Tel/POA</b>           | 0.001                | 0.0002         | p=0.0331      |
| Male Type II |                             | 0.027* <sup>1</sup>  | 0.022          | dF=2, 10      |
| Female       |                             | 0.0014               | 0.0004         | Fratio=4.89   |
| Male Type I  | <b>Mid/Di/Cbl</b>           | 0.0049               | 0.0035         | p=0.4511      |
| Male Type II |                             | 0.0284               | 0.0189         | dF=2, 11      |
| Female       |                             | 0.0131               | 0.0123         | Fratio=0.8565 |
| Male Type I  | <b>Vocal Hindbrain – SC</b> | 0.0004               | 0.0001         | p=0.0021      |
| Male Type II |                             | 0.0086* <sup>2</sup> | 0.0037         | dF=2, 10      |
| Female       |                             | 0.0004               | 0.0001         | Fratio=12.12  |
| Male Type I  | <b>Vocal Muscle</b>         | 0.0001               | 0.00002        | p=0.0023      |
| Male Type II |                             | 0.0022* <sup>2</sup> | 0.0003         | dF=2, 11      |
| Female       |                             | 0.0007               | 0.0005         | Fratio=11.10  |
| Male Type I  | <b>Liver</b>                | 0.0013               | 0.0012         | p=0.1742      |
| Male Type II |                             | 0.0024               | 0.001          | dF=2, 12      |
| Female       |                             | 0.0144               | 0.014          | Fratio=2.03   |
| Male Type I  | <b>Testis</b>               | 0.0078               | 0.0077         | p=0.0623      |
| Male Type II |                             | 0.0071               | 0.0014         | dF=1, 7       |
|              |                             |                      | Fratio=4.91    |               |

<sup>1</sup>II>I, <sup>2</sup>II>F and I

Supplemental Table 4: Mineralocorticoid receptor (MR) mRNA levels for tissues sampled in the three midshipman reproductive morphs. Mean normalized values (see Fig. 3 legend) and standard errors are listed for mRNA levels according to midshipman reproductive morph (column 1) and tissue sampled (column 2, see Fig. 3 for abbreviations). ANOVA values (p value, degrees of freedom-dF, and Fratio) are also listed for each analysis performed for each tissue. Asterisks indicate significantly greater values over one or both other morphs for each tissue (see footnotes).
